# Characterising undiagnosed chronic obstructive pulmonary disease: a systematic review and meta-analysis

---

**Authors:** Kate M. Johnson, M.Sc.<sup>1</sup>; Stirling Bryan, PhD<sup>2</sup>; Shahzad Ghanbarian, PhD<sup>1</sup>; Don D. Sin, MD<sup>3</sup>; Mohsen Sadatsafavi, PhD<sup>1,2,4</sup>

**Affiliations:**

1. Collaboration for Outcomes Research and Evaluation, Faculty of Pharmaceutical Sciences, University of British Columbia, Vancouver, Canada
2. Centre for Clinical Epidemiology and Evaluation, Vancouver Coastal Health Institute, Vancouver, Canada
3. Centre for Heart Lung Innovation (the James Hogg Research Centre), St. Paul's Hospital, Vancouver, Canada
4. Institute for Heart and Lung Health, Department of Medicine, the University of British Columbia, Vancouver, Canada

**Corresponding Author:** Mohsen Sadatsafavi

Faculty of Pharmaceutical Sciences, University of British Columbia, Vancouver Campus,  
2405 Wesbrook Mall  
Vancouver, BC Canada V6T 1Z3  
Tel: 604.827.3020 | Fax: 604.875.5179  
Email: [msafavi@mail.ubc.ca](mailto:msafavi@mail.ubc.ca)

Table Count: 1

Figure Count 5

Word Count: 3,391 (without abstract, research in context, acknowledgements, references, figure legends, captions)

**Declaration of interests:** We declare no competing interests.

**Author Contributions:** MS, SB, and KJ formulated the study idea and designed the study. KJ and SG performed all data analyses and MS, SB and DS contributed to interpretation of findings. KJ wrote the first draft of the manuscript. All authors critically commented on the manuscript and approved the final version. MS is the guarantor of the manuscript.

## 1 **Summary**

2 **Background:** A significant proportion of patients with chronic obstructive pulmonary  
3 disease (COPD) remain undiagnosed. Characterising these patients can increase our  
4 understanding of the 'hidden' burden of COPD and the effectiveness of case detection  
5 interventions.

6 **Methods:** We conducted a systematic review and meta-analysis to compare patient and  
7 disease risk factors between patients with undiagnosed persistent airflow limitation and  
8 those with diagnosed COPD. We searched MEDLINE and EMBASE for observational  
9 studies of adult patients meeting accepted spirometric definitions of COPD. We extracted  
10 and pooled summary data on the proportion or mean of each risk factor among diagnosed  
11 and undiagnosed patients (unadjusted analysis), and coefficients for the adjusted  
12 association between risk factors and diagnosis status (adjusted analysis). This protocol is  
13 registered with PROSPERO (CRD42017058235).

14 **Findings:** 2,083 records were identified through database searching and 16 articles were  
15 used in the meta-analyses. Diagnosed patients were less likely to have mild (v. moderate  
16 to very severe) COPD (odds ratio [OR] 0.30, 95% CI 0.24-0.37, 6 studies) in unadjusted  
17 analysis. This association remained significant but its strength was attenuated in the  
18 adjusted analysis (OR 0.72, 95% CI 0.58-0.89, 2 studies). Diagnosed patients were more  
19 likely to report respiratory symptoms such as wheezing (OR 3.51, 95% CI 2.19-5.63, 3  
20 studies) and phlegm (OR 2.16, 95% CI 1.38-3.38, 3 studies), had more severe dyspnoea  
21 (modified Medical Research Council scale mean difference 0.52, 95% CI 0.40-0.64, 3  
22 studies) and slightly greater smoking history than undiagnosed patients. Patient age, sex,

23 current smoking status, and the presence of coughing were not associated with a previous  
24 diagnosis.

25 **Interpretation:** Patients with undiagnosed persistent airflow limitation had less severe  
26 airflow obstruction and fewer respiratory symptoms than diagnosed patients. This  
27 indicates that there is lower disease burden among undiagnosed patients compared to  
28 those with diagnosed COPD, which may significantly delay the diagnosis of COPD.

29 **Funding:** Canadian Institutes of Health Research.

30

31 **Word Count:** 304

32

33 **Keywords:** Delayed diagnosis, Diagnostic errors, Differential diagnosis, Risk factors,  
34 Chronic Obstructive Pulmonary Disease, Systematic review, Meta-analysis

### 35 **Research in context**

#### 36 **Evidence before this study**

37 Many cross-sectional prevalence studies have compared the characteristics of patients  
38 with persistent airflow limitation but no prior diagnosis of COPD ('undiagnosed') to  
39 those with persistent airflow limitation and a diagnosis of COPD ('diagnosed'). We  
40 searched MEDLINE and EMBASE for observational studies published in English  
41 between January 1, 1980 and April 11, 2017 that assessed diagnosis status among adult  
42 patients with spirometrically defined persistent airflow limitation. We used search terms  
43 relating to COPD (including "chronic obstructive pulmonary disease" OR "bronchitis"  
44 OR "emphysema") AND diagnosis ("diagnostic errors" OR "undiagnosed) AND risk  
45 factors ("risk factors" OR "characteristics") to identify references. 18 articles met the

46 eligibility criteria and 16 were included in the meta-analysis. Approximately half of the  
47 18 eligible studies used random sampling of the general population; the other half used  
48 convenience sampling (e.g., recruitment from health-care settings) and tended to score  
49 lower in our qualitative quality assessment. We used summary data from the included  
50 articles to generate pooled estimates of the associations between sex, age, current  
51 smoking status, smoking history, respiratory symptoms, disease severity, and the  
52 likelihood of having received a previous diagnosis of COPD. Overall, disease  
53 characteristics had much greater discriminatory ability than patient characteristics, and  
54 more severe disease was the most characteristic of patients with ‘diagnosed’ COPD,  
55 followed by the presence of respiratory symptoms. Patients with ‘diagnosed’ COPD were  
56 70% less likely to have mild disease compared to moderate, severe, or very severe  
57 COPD, and they were two to five times more likely to report the presence of respiratory  
58 symptoms such as wheeze, phlegm, and dyspnoea.

#### 59 **Added value of this study**

60 Lamprecht et al. found that undiagnosed patients tended to be younger male never  
61 smokers with fewer respiratory symptoms and less severe COPD using individual data  
62 from four population-based studies. Our study extends these findings by providing pooled  
63 estimates of the associations between patient and disease factors and the likelihood of  
64 receiving a diagnosis of COPD. Our results confirm the strong association between  
65 disease severity, respiratory symptoms, and COPD diagnosis that was previously  
66 reported. However, pooled estimates from 16 studies revealed no association between  
67 patient characteristics (age, sex) and COPD diagnosis, and only a weak association with  
68 smoking history. These estimates were consistent across alternate definitions of persistent

69 airflow limitation, the population sampled (general population v. health-care setting), and  
70 analysis methods (contingency tables v. regression models). Our study provides a robust  
71 and generalizable characterisation of patients with undiagnosed persistent airflow  
72 limitation.

### 73 **Implications of all the available evidence**

74 This systematic review and meta-analysis provides strong evidence that undiagnosed  
75 patients tend to have milder disease and fewer symptoms. Our findings can be used as  
76 selection criteria to target subgroups of patients with a high prevalence of underdiagnosis  
77 for case detection or screening. They also show that the burden of disease is lower in  
78 patients with undiagnosed persistent airflow limitation than in those with diagnosed  
79 COPD, indicating that there is a substantial lag between the development of persistent  
80 airflow limitation and receiving a diagnosis of COPD. This delay is a key missed  
81 opportunity to modify risk factors at the critical early stages of disease development.

## 82 **Introduction**

83 Chronic Obstructive Pulmonary Disease (COPD) is an inflammatory lung disorder that is  
84 characterised by persistent airflow limitation<sup>1</sup> and associated with symptoms of shortness  
85 of breath, cough and sputum production.<sup>2</sup> Patients with COPD generally seek medical  
86 attention when they experience respiratory symptoms, most notably dyspnoea that is  
87 persistent and progressive.<sup>1</sup> However, owing to under-utilization of lung function  
88 measurements and non-specific nature of the symptoms, COPD is often not recognized  
89 until late in the disease process. Indeed, many patients do not receive a diagnosis of  
90 COPD until after being hospitalized due to a severe exacerbation.<sup>3</sup>  
91 Lamprecht et al.<sup>4</sup> reported an average underdiagnosis rate of 81% in a prevalence study  
92 that included 30,874 participants across 44 countries. Reducing risk factors such as  
93 smoking and occupational risk factors while the disease is early in its progression is an  
94 important component of treatment for COPD.<sup>5</sup> As such, late diagnosis of COPD  
95 represents a missed opportunity to modify the course of the disease through evidence-  
96 informed risk factor management and treatment.<sup>6,7</sup> The extent of this missed opportunity  
97 is a function of both the number of COPD patients who are undiagnosed, as well as the  
98 burden of disease (e.g., symptom burden, lung function status) in this population.  
99 Quantifying the true burden of undiagnosed COPD can be informed by a comparative  
100 assessment of patient- and disease-factors between diagnosed and undiagnosed patients.  
101 Numerous studies have compared the characteristics of patients with undiagnosed and  
102 diagnosed COPD, but to the best of our knowledge, these studies have never been  
103 systematically compiled and pooled. We hypothesized that the characteristics of patients,

104 their risk factors, respiratory symptoms, and disease stage influence the likelihood of  
105 receiving a diagnosis of COPD.

## 106 **Methods**

### 107 *Search strategy and selection criteria*

108 We conducted a systematic review and meta-analysis to compare patient characteristics,  
109 risk factors, and symptoms in diagnosed and undiagnosed patients. We searched  
110 MEDLINE and EMBASE using the Ovid interface for eligible articles. The search  
111 strategy (Appendix, Text A1) was developed in MEDLINE and adapted to EMBASE  
112 using appropriate vocabulary terms. We included longitudinal or cross-sectional studies  
113 published in English between 1980 and April 11, 2017 that were based on original  
114 analysis of individual data. We did not include conference abstracts unless they met the  
115 inclusion criteria and provided the required information, and we did not assess grey  
116 literature. We extracted summary data from the eligible articles and contacted the authors  
117 to obtain additional information when required (one author group provided us with  
118 additional information). Title and abstract screening were initially performed, followed  
119 by full-text analysis to determine article eligibility. We extracted data using a customized  
120 Excel spreadsheet after the eligible articles had been compiled. KJ initially performed the  
121 selection procedure, and SG independently repeated each step on a subset (10%) of  
122 articles. Discrepancies were resolved through discussions between the two reviewers.  
123 Duplicate articles found in both MEDLINE and EMBASE were identified using a  
124 reference manager and manually removed. We used the Quality Assessment Tool for  
125 Observational Cohort and Cross-Sectional Studies developed by the National Institutes of  
126 Health National Heart, Lung, and Blood Institute<sup>8</sup> to assign an overall quality rating

127 (good, fair, or poor) to each study. KJ extracted relevant data and assessed the quality of  
128 the included studies, and SG replicated the assessment on 10% of articles. The reviewers  
129 determined the overall quality of each article by assigning 'yes', 'no', or 'other' (cannot  
130 determine, not applicable, or not reported) to 14 questions relating to external validity,  
131 bias in the measurements of the risk factors or outcomes, and confounders present in the  
132 study. The results of this assessment were assessed qualitatively.

133 The population of interest in this review were adult patients ( $\geq 18$  years old) with  
134 persistent airflow limitation at the time of assessment. Persistent airflow limitation was  
135 defined when the study subjects demonstrated a ratio of Forced Expiratory Volume in 1  
136 Second ( $FEV_1$ ) to Forced Vital Capacity (FVC)  $< 0.7$  (fixed ratio definition)<sup>1</sup> or  $FEV_1$  to  
137 FVC lower than the lower limit of normal (LLN definition)<sup>9</sup> after the administration of a  
138 bronchodilator during spirometry. Study subjects who had airflow limitation and also a  
139 prior diagnosis of COPD or an obstructive lung disease (emphysema, chronic bronchitis,  
140 asthma) from a health-care professional were considered to have 'diagnosed' COPD,  
141 whereas those with persistent airflow limitation but without a prior health professional  
142 diagnosis of COPD were considered to be 'undiagnosed'. Patients with other respiratory  
143 diseases were excluded. We included studies that sampled patients from any population  
144 or health-care setting.

145 Given the exploratory nature of the observational studies included in this review, we used  
146 a broad definition of risk factors that included any observable factor that could be  
147 associated with the probability of having received a diagnosis of COPD. Risk factors  
148 included patient-reported respiratory symptoms (cough, wheeze, phlegm, dyspnoea), sex,  
149 age, current smoking status, smoking history (pack-years), and disease severity classified



150 using the Global Initiative for chronic Obstructive Lung Disease (GOLD) grades. The  
151 relationship of interest was the association between these risk factors and the probability  
152 of having ‘diagnosed’ COPD among patients with persistent airflow limitation.  
153 We extracted summary data from each eligible article, which included study  
154 characteristics, the definition of persistent airflow limitation that was employed in each of  
155 the studies, the method of COPD diagnosis, and sample size. We also extracted the  
156 proportion or mean of risk factors between the diagnosed and undiagnosed groups, as  
157 well as the odds ratios (ORs) and their confidence intervals in studies that used regression  
158 modelling to assess the independent impact of the risk factors on diagnosis status. The  
159 protocol for this study is registered on the PROSPERO register of systematic reviews  
160 (CRD42017058235).<sup>10</sup>

### 161 *Data analysis*

162 We used data extracted from articles measuring categorical data to generate ORs and  
163 standard errors for the association between risk factors and the probability of having  
164 received a diagnosis of COPD. In articles assessing continuous data, we calculated the  
165 mean difference (MD) in risk factors and their standard errors among diagnosed and  
166 undiagnosed patients. We pooled the ORs or MDs from individual studies using the  
167 inverse variance method implemented with the ‘meta’ package<sup>11</sup> in R Statistical  
168 Software<sup>12</sup> (version 3.3.3). We used fixed-effects models when estimates from only two  
169 studies were being pooled, or if the null hypothesis that all studies evaluated the same  
170 effect was not rejected (at 0.05 significance level) using Cochran’s Q statistic.<sup>13</sup>  
171 Otherwise, we used random-effects models. We quantified heterogeneity between studies  
172 using the  $I^2$  statistic.<sup>14</sup> We did not pool together studies that used alternate definitions of

173 persistent airflow limitation (fixed ratio and LLN). When separate studies used subsets of  
174 the same dataset (i.e., the Latin American Project for the Investigation of Obstructive  
175 Lung Disease [PLATINO] dataset<sup>4,15-17</sup>), we used the estimate from the study with the  
176 largest sample size. We conducted a sensitivity analysis to determine the association  
177 between the risk factors and COPD diagnosis only among population-based studies  
178 (those based on random sampling of the general population as opposed to convenience  
179 sampling).

#### 180 *Role of the funding source*

181 The funder of this study had no role in study design, data collection, data analysis, data  
182 interpretation, or writing of the report. The corresponding author and co-authors had full  
183 access to the data in the study and take responsibility for the integrity of the data, the  
184 accuracy of the analyses, and the decision to submit for publication.

## 185 **Results**

186 The search resulted in 1,857 references after excluding duplicates. 1,788 references were  
187 excluded by screening their titles and abstracts, and 69 remained for full text review to  
188 determine eligibility. A total of 18 articles met the inclusion criteria following the  
189 screening process, but only 16 articles were included in quantitative synthesis (Figure 1).  
190 The overall agreement between reviewers was high (90%).

191 [<<Figure 1>>](#)

192 A summary of the 18 eligible articles is presented in Table 1. However, two eligible  
193 articles were excluded from the meta-analysis because they were missing the necessary  
194 information,<sup>18</sup> or did not measure any risk factors in common with other studies.<sup>19</sup> The

195 majority of the 18 eligible articles were cross-sectional (n=16), and were population-  
196 based (n=10). Other studies sampled patients from primary care clinics (n=4),  
197 hospitalized patients (n=3), or participants in a smoking cessation program (n=1). Studies  
198 originated from Latin America (n=6), Europe (n=6), Canada (n=2), and Asia (n=2). Data  
199 from the Epidemiologic Study of COPD in Spain (EPI-SCAN),<sup>4,20,21</sup> PLATINO, and the  
200 Burden of Obstructive Lung Disease (BOLD),<sup>4,22</sup> were used in three, four, and two  
201 different studies, respectively, but only one study from each dataset was included in  
202 pooled analyses. The definition of persistent airflow limitation varied between articles; 15  
203 studies defined it as the fixed ratio, two studies used the LLN definition, and one study  
204 reported results using both definitions. The percentage of patients with undiagnosed  
205 persistent airflow limitation was greater than 50% in all but two studies (which sampled  
206 from health-care settings).

207 [<<Table 1>>](#)

208 The quality of the 18 eligible articles was variable. Half of the studies were assigned a  
209 quality rating of ‘good’, seven studies were assigned a rating of ‘fair’, and two studies  
210 were deemed poor in quality. Studies that were not assigned a ‘good’ quality rating  
211 generally had a primary study focus that was not our question of interest. For example,  
212 comparing the characteristics of diagnosed and undiagnosed patients was only reported  
213 tangentially in five studies, and disease severity was the only factor that was compared  
214 between the undiagnosed and diagnosed groups in three of the studies. The use of  
215 regression modelling to examine the independent impact of risk factors on the likelihood  
216 of receiving a COPD diagnosis was uncommon (performed in only seven studies), and in

217 studies that used regression modelling, the risk factors that were adjusted for varied  
218 substantially.

219 *Unadjusted analysis*

220 Comparisons of the characteristics of diagnosed and undiagnosed patients with persistent  
221 airflow limitation based on contingency tables ('unadjusted analysis') were reported in 12  
222 studies. Because of the predominance of the fixed-ratio definition of airflow limitation,  
223 pooled results from studies that used this definition are reported in the main text and  
224 LLN-based results are provided in the Appendix. Pooled comparisons of sex, respiratory  
225 symptoms, current smoking status, smoking history, and COPD severity among patients  
226 meeting the fixed ratio definition of airflow limitation are shown in Figure 2.

227 [<<Figure 2>>](#)

228 Patients with 'diagnosed' COPD were more likely to be experiencing respiratory  
229 symptoms such as wheezing (OR 3.51, 95% CI 2.19-5.63, 3 studies), phlegm (OR 2.16,  
230 95% CI 1.38-3.38, 3 studies), dyspnoea (OR 4.67, 95% CI 2.62-8.35, 3 studies), or any  
231 respiratory symptoms (OR 11.45 95% CI 7.20-18.21, 3 studies). They were much less  
232 likely to have mild (grade I) COPD than moderate to very severe COPD (grade II-IV) as  
233 measured by GOLD grades (OR 0.30 95% CI 0.24-0.37, 7 studies). The heterogeneity  
234 between studies was relatively low ( $I^2 < 35.0\%$  for wheeze, phlegm, dyspnoea, any  
235 symptoms, and COPD severity); however, the  $I^2$  statistics should be interpreted  
236 cautiously due to the low number of studies within each category. Patient sex, current  
237 smoking status, and smoking history were not associated with 'diagnosed' COPD.  
238 Having a cough was also not significantly associated with diagnosis status, however

239 variability between the three studies measuring this risk factor was particularly high ( $I^2$   
240 77.9%).  
241 Sensitivity analysis of only the population-based studies revealed very similar results  
242 (n=5 studies, Appendix, Figure A1). Pooled analysis of two studies<sup>22,23</sup> using the LLN  
243 definition of airflow limitation was consistent with the findings based on fixed ratio  
244 results (Appendix, Figure A2); however, cough was marginally associated with diagnosis  
245 status in this analysis (OR 1.65, 95% CI 1.02-2.66).

246 [<<Figure 3>>](#)

247 Similarly, patients with ‘diagnosed’ COPD (fixed ratio definition) were more impaired by  
248 dyspnoea (modified Medical Research Council [mMRC] dyspnoea scale<sup>24</sup> MD 0.52, 95%  
249 CI 0.40-0.64, 3 studies) and had greater airflow obstruction (percent predicted FEV<sub>1</sub> MD  
250 -12.85%, 95% CI -15.26% to -10.44%, 4 studies) than undiagnosed patients. Patients  
251 with ‘diagnosed’ COPD also had a slightly greater smoking history (pack-years MD 8.39,  
252 95% CI 0.68-16.44, 4 studies); however there was high variability between the study  
253 means ( $I^2$  84.2%). There was no difference in mean age between diagnosed and  
254 undiagnosed patients.

255 [<<Figure 4>>](#)

### 256 *Adjusted analysis*

257 Articles using regression modelling to assess the independent impact of risk factors on  
258 COPD diagnosis (‘adjusted analysis’) were pooled by risk factor type, and the results are  
259 presented in Figure 4 for the fixed ratio definition of persistent airflow limitation (5  
260 articles), and Figure 5 for the LLN definition (2 articles with 5 datasets). The effect sizes  
261 of the risk factors were attenuated in these adjusted analyses. The presence of phlegm had

262 a weak independent association with the diagnosis of COPD (OR 1.16, 95% CI 1.00-  
263 1.35, 2 studies) using the fixed ratio definition. The presence of wheezing (OR 1.20, 95%  
264 CI 0.99-1.44, 2 studies) and dyspnoea (OR 1.13 95% CI 0.99-1.29, 2 studies) were not  
265 independently associated with a diagnosis. In contrast, mild COPD (GOLD grade I OR  
266 0.72, 95% CI 0.58-0.80) or moderate COPD (GOLD grade II, OR 0.71, 95% CI 0.58-  
267 0.86), were independently associated with a lower likelihood of diagnosis, compared with  
268 severe or very severe (reference GOLD grades III-IV). Sex and the presence of cough did  
269 not influence the likelihood of being diagnosed in the adjusted analyses, although the  
270 number of studies were small and heterogeneity in the effect estimates between studies  
271 was very high ( $I^2 > 70.0\%$  for all risk factors except sex).

272 [<<Figure 5>>](#)

273 Three risk factors were pooled in our assessment of studies using adjusted analysis based  
274 on the LLN definition of persistent airflow limitation. This analysis indicated a more  
275 strongly positive association between the presence of phlegm and being diagnosed with  
276 COPD (OR 1.71, 95% CI 1.15-2.56), although there was heterogeneity between datasets  
277 ( $I^2 75.2\%$ ). Patient sex and the presence of cough had no independent effect.

## 278 **Discussion**

279 The presence of respiratory symptoms and GOLD 3 or 4 disease severity was strongly  
280 associated with a prior diagnosis of COPD among individuals with persistent airflow  
281 limitation on spirometry. These findings were relatively consistent across analysis  
282 methods and alternate definitions of persistent airflow limitation. Greater disease severity  
283 was the most important characteristic of diagnosed patients in two out of three pooled  
284 analyses in which spirometry was performed. In particular, patients with mild or

285 moderate COPD (as measured by GOLD grades) were 78% less likely to have received a  
286 diagnosis than patients with severe or very severe COPD in the unadjusted analysis  
287 (based on contingency tables), and mean percent predicted FEV<sub>1</sub> was 13% lower in  
288 diagnosed than undiagnosed patients. Disease severity was also the only risk factor that  
289 was associated with a diagnosis in both the unadjusted and adjusted (based on regression  
290 modelling) analyses. In the adjusted analysis, patients with moderate COPD were 29%  
291 less likely to have received a diagnosis than patients with severe or very severe COPD.  
292 Respiratory symptoms were another group of risk factors that were correlated with a  
293 COPD diagnosis. Among respiratory symptoms, the presence of dyspnoea was the most  
294 strongly associated with a previous diagnosis in the unadjusted analysis. Patients with  
295 ‘diagnosed’ COPD scored 0.52 points higher on the mMRC dyspnoea scale. However,  
296 there was only one study<sup>25</sup> in which the mean score on the mMRC scale could have been  
297 used to distinguish undiagnosed from diagnosed patients using commonly accepted  
298 criteria (‘more dyspnoea’ if mMRC score  $\geq 2$  v. ‘less dyspnoea’ if mMRC score  $< 2$ ).<sup>1</sup>  
299 Following dyspnoea, the presence of wheeze, and phlegm was also strongly associated  
300 with ‘diagnosed’ COPD in the unadjusted analysis. However, in the adjusted analysis,  
301 phlegm was the only symptom that was independently associated with having received a  
302 diagnosis, and this association was weaker than the unadjusted one. Interestingly, the  
303 presence of coughing was not well associated with a previous diagnosis in any of the  
304 pooled analyses. Overall, aside from the attenuated results in the adjusted analysis  
305 (discussed in detail below), our findings suggest a strong association between the  
306 presence of dyspnoea, phlegm, or wheeze and a COPD diagnosis. In addition to patients  
307 with respiratory symptoms being more likely to seek care, current guidelines now

308 consider the presence of symptoms as part of the criteria for diagnosing COPD among  
309 patients with persistent airflow limitation<sup>1</sup>.

310 Patient characteristics such as sex and age were not associated with an increased  
311 likelihood of having received a diagnosis in any of the pooled analyses. There was some  
312 indication that patients with ‘diagnosed’ COPD had a greater pack-year smoking history,  
313 although current smoking status and smoking history were not statistically significant  
314 when they were assessed as the presence of former smoking and never smoking.

315 The effects of risk factors on the likelihood of being diagnosed were weaker in the  
316 adjusted analyses than in the unadjusted analyses. The adjusted analyses were based on  
317 pooled coefficients from regression modelling. Although the inclusion of covariates is  
318 expected to reduce the effects sizes compared to odds ratios derived from contingency  
319 tables (as in the unadjusted analysis), one study in the adjusted analysis<sup>23</sup> had unusual  
320 results that received disproportionate weighting. In contrast to all other studies in this  
321 review, Herrera et al.<sup>23</sup> found that respiratory symptoms were not associated with the  
322 likelihood of having received a diagnosis of COPD. In the adjusted analysis, these results  
323 were pooled with one other study<sup>17</sup>, which found that the presence of respiratory  
324 symptoms strongly impacted the likelihood of receiving a diagnosis. This discrepancy  
325 between studies may be due to differences in the population that was sampled (primary  
326 care clinic<sup>23</sup> versus general population<sup>17</sup>). In general, studies in clinic settings might have  
327 observed smaller differences between undiagnosed and diagnosed patients because they  
328 sampled from a subset of patients that were prompted to seek care because of a symptom  
329 burden.



330 Our systematic review has several strengths. First, we used data from a total of 16 articles  
331 in the meta-analysis, and these articles were mostly population-based studies that scored  
332 high in quality. Second, there were a robust number of studies for many risk factors;  
333 patient sex was assessed in 10 studies in total, followed by disease severity in 9 studies,  
334 and respiratory symptoms and smoking history in 8 studies each. The methods used to  
335 measure disease severity, respiratory symptoms, and smoking history were relatively  
336 consistent across studies, which facilitated pooling of their findings. Lastly, we conducted  
337 several pooled analyses to assess the sensitivity of our findings to alternate definitions of  
338 COPD (fixed ratio and LLN) and analysis methods (unadjusted and adjusted analyses).  
339 Except for one study,<sup>23</sup> our findings were consistent.

340 However, our systematic review also has several limitations. First, half of the pooled  
341 samples were based on data from three large prevalence studies (EPI-SCAN, PLATINO,  
342 and BOLD). This resulted in overrepresentation of patients in Spain and Latin America;  
343 differences in patient and physician behaviour and health-care services use can result in  
344 findings that vary across settings. Second, although the total number of studies for each  
345 risk factor was robust, the number of studies assessing each risk factor within pooled  
346 analyses tended to be small. This was partly because separate articles using the same  
347 dataset could not be combined in our pooled analyses. The number of studies used in the  
348 unadjusted analysis of respiratory symptoms and the adjusted analysis using the LLN  
349 definition of COPD was reduced as a result. Third, with the exception of dyspnoea, all  
350 other respiratory symptoms in the pooled analyses were measured as binary variables  
351 (either present or absent). Given our finding that symptoms are characteristic of a COPD  
352 diagnosis, a more nuanced assessment of their severity might result in an even greater

353 ability to distinguish between undiagnosed and diagnosed patients. In addition, because  
354 respiratory symptoms were self-reported in all studies, reporting bias might have  
355 exaggerated the difference in symptoms between the undiagnosed and diagnosed groups.  
356 The findings from this systematic review have important implications for research and  
357 policy around COPD diagnosis, for example, in estimating the return on investment in  
358 screening and case detection strategies for COPD. The true burden of COPD is the sum  
359 of the disease burden in diagnosed and undiagnosed patients, and our results indicate that  
360 undiagnosed patients generally have milder disease and therefore a lower disease burden.  
361 On one hand, this indicates that strategies aiming to reduce the underdiagnosis problem  
362 are unlikely to result in immediate and dramatic improvements in patient-related  
363 outcomes such as symptom burden. On the other hand, the gap in disease severity and  
364 symptom burden between diagnosed and undiagnosed patients indicates a delay in COPD  
365 diagnosis among patients that have already developed symptoms. Given the potential for  
366 disease modification at early stages of COPD, reducing this delay could be associated  
367 with substantial improvement in long-term patient outcomes and a reduction in mortality  
368 and costs.

369

370 **Acknowledgements:** This study was funded by the Canadian Institutes of Health  
371 Research (application number 142238).

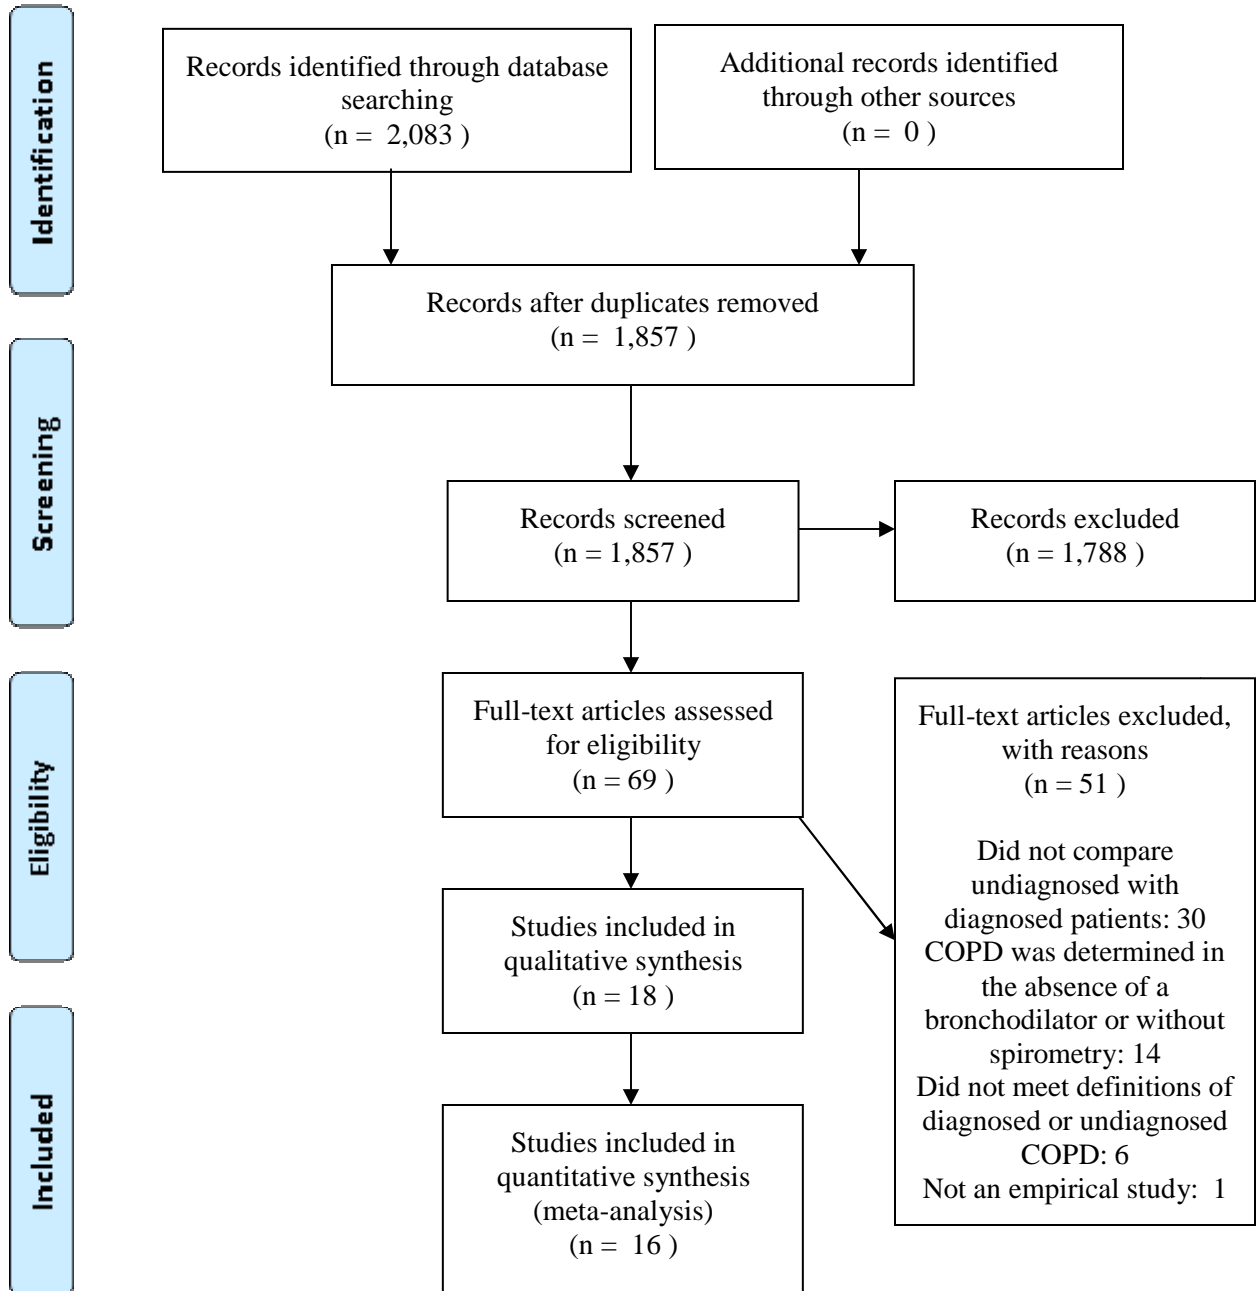

**Figure 1:** Preferred Reporting Items for Systematic Reviews and Meta-Analyses flow diagram.

**Table 1:** Characteristics of selected studies

|                                             | Country                                 | Study type                           | Population                                                      | Definition of COPD                                                                | Definition of undiagnosed COPD                                                                                                          | Participants with COPD | Percentage undiagnosed | Quality rating |
|---------------------------------------------|-----------------------------------------|--------------------------------------|-----------------------------------------------------------------|-----------------------------------------------------------------------------------|-----------------------------------------------------------------------------------------------------------------------------------------|------------------------|------------------------|----------------|
| <b>Ancochea et al. (2013)<sup>20</sup></b>  | Spain                                   | Cross-sectional ( <i>EPI-SCAN*</i> ) | General Population, Random sample                               | Post-bronchodilator FEV <sub>1</sub> /FVC<0.7                                     | Spirometric obstruction and no previous diagnosis of COPD (self-reported)                                                               | 386                    | 73%                    | Good           |
| <b>Balcells et al. (2015)<sup>3</sup></b>   | Spain                                   | Prospective cohort study             | Hospitalized patients, all eligible patients were invited       | Post-bronchodilator FEV <sub>1</sub> /FVC<0.7, 3 months after discharge           | Spirometric obstruction and no diagnosis of respiratory disease or regular use of pharmacological respiratory treatment (self-reported) | 342                    | 34%                    | Good           |
| <b>Artyukhov et al. (2015)<sup>18</sup></b> | Russia                                  | Cross-sectional                      | General Population, Random sample                               | Post-bronchodilator FEV <sub>1</sub> /FVC<0.7 and FEV <sub>1</sub> <80% predicted | Spirometric obstruction and no previous diagnosis of COPD (self-reported)                                                               | NR                     | NR                     | Poor           |
| <b>de Godoy et al. (2007)<sup>19</sup></b>  | Brazil                                  | Cross-sectional                      | Participants in a smoking cessation program, Convenience sample | Post-bronchodilator FEV <sub>1</sub> /FVC<0.7                                     | Spirometric obstruction and no previous diagnosis of COPD (self-reported)                                                               | 57                     | 68%                    | Fair           |
| <b>Herrera et al. (2016)<sup>23</sup></b>   | Argentina, Colombia, Venezuela, Uruguay | Cross-sectional                      | Primary care clinics, convenience sample                        | Post-bronchodilator FEV <sub>1</sub> /FVC<0.7 and LLN                             | Spirometric obstruction and no previous diagnosis of chronic bronchitis, emphysema, or COPD (self-reported)                             | 309                    | 77%                    | Fair           |
| <b>Hill et al. (2010)<sup>26</sup></b>      | Canada                                  | Cross-sectional                      | Primary care clinics, convenience sample                        | Post-bronchodilator FEV <sub>1</sub> /FVC<0.7 and FEV <sub>1</sub> <80% predicted | Spirometric obstruction and no previous diagnosis of COPD based on medical chart review over the previous 12-months                     | 107                    | 46%                    | Good           |
| <b>Hvidsten et al. (2010)</b>               | Norway                                  | Cross-sectional                      | General Population,                                             | Post-bronchodilator                                                               | Spirometric obstruction and being treated by a physician or admitted                                                                    | 303                    | 66%                    | Good           |

|                                                |        |                                                                                         |                                                         |                                                                                                                             |                                                                                                             |      |     |      |
|------------------------------------------------|--------|-----------------------------------------------------------------------------------------|---------------------------------------------------------|-----------------------------------------------------------------------------------------------------------------------------|-------------------------------------------------------------------------------------------------------------|------|-----|------|
|                                                |        |                                                                                         | Random sample                                           | FEV <sub>1</sub> /FVC<0.7                                                                                                   | to hospital for obstructive lung disease in the previous 12-months (self-reported)                          |      |     |      |
| <b>Labonté et al. (2016)</b> <sup>27</sup>     | Canada | Prospective cohort study                                                                | General Population, Random sample                       | Post-bronchodilator FEV <sub>1</sub> /FVC<0.7                                                                               | Spirometric obstruction and no previous diagnosis of chronic bronchitis, emphysema, or COPD (self-reported) | 505  | 70% | Fair |
| <b>Lamprecht et al. (2015)</b> <sup>4</sup>    | Global | Cross-sectional ( <i>BOLD</i> †, <i>PLATINO</i> ‡, <i>EPI-SCAN</i> , <i>PREPOCOL</i> §) | General Population, Random sample                       | Post-bronchodilator FEV <sub>1</sub> /FVC<LLN                                                                               | Spirometric obstruction and no previous diagnosis of chronic bronchitis, emphysema, or COPD (self-reported) | 2992 | 81% | Good |
| <b>Llordes et al. (2015)</b> <sup>28</sup>     | Spain  | Cross-sectional                                                                         | Primary care clinic, all eligible patients were invited | Post-bronchodilator FEV <sub>1</sub> /FVC<0.7 in 2 tests 4 weeks apart (the 2nd after 4 weeks of pharmacological treatment) | Spirometric obstruction and no previous diagnosis of COPD in medical reports                                | 422  | 57% | Fair |
| <b>Mahishale et al. (2015)</b> <sup>29</sup>   | NR     | Cross-sectional                                                                         | Hospitalized patients, convenience sample               | Post-bronchodilator FEV <sub>1</sub> /FVC<0.7                                                                               | Spirometric obstruction and no previous diagnosis of COPD (self-reported)                                   | 404  | 56% | Poor |
| <b>Miravittles et al. (2009)</b> <sup>21</sup> | Spain  | Cross-sectional ( <i>EPI-SCAN</i> )                                                     | General Population, Random sample                       | Post-bronchodilator FEV <sub>1</sub> /FVC<0.7                                                                               | Spirometric obstruction and no previous diagnosis of chronic bronchitis, emphysema, or COPD (self-reported) | 408  | 73% | Good |
| <b>Moreira et al. (2013)</b> <sup>15</sup>     | Brazil | Cross-sectional ( <i>PLATINO</i> )                                                      | General Population, Random sample                       | Post-bronchodilator FEV <sub>1</sub> /FVC<0.7                                                                               | Spirometric obstruction and no previous diagnosis of chronic bronchitis, emphysema, or COPD (self-reported) | 53   | 62% | Fair |
| <b>Nascimento et al. (2007)</b> <sup>16</sup>  | Brazil | Cross-sectional ( <i>PLATINO</i> )                                                      | General Population, Random sample                       | Post-bronchodilator FEV <sub>1</sub> /FVC<0.7                                                                               | Spirometric obstruction and no previous diagnosis of chronic bronchitis, emphysema, or COPD (self-reported) | 144  | 88% | Fair |
| <b>Queiroz et al.</b>                          | Brazil | Cross-sectional                                                                         | Primary care                                            | Post-                                                                                                                       | Spirometric obstruction and no                                                                              | 63   | 71% | Good |

|                                             |                                           |                                       |                                                           |                                                  |                                                                                                             |     |     |      |
|---------------------------------------------|-------------------------------------------|---------------------------------------|-----------------------------------------------------------|--------------------------------------------------|-------------------------------------------------------------------------------------------------------------|-----|-----|------|
| (2012) <sup>25</sup>                        |                                           |                                       | clinics, convenience sample                               | bronchodilator<br>FEV <sub>1</sub> /FVC<0.7      | previous diagnosis of chronic bronchitis, emphysema, or COPD (self-reported)                                |     |     |      |
| <b>Schirnhof et al. (2011)<sup>22</sup></b> | Austria                                   | Cross-sectional<br>( <i>BOLD</i> )    | General Population, Random sample                         | Post-bronchodilator<br>FEV <sub>1</sub> /FVC<LLN | Spirometric obstruction and no previous diagnosis of chronic bronchitis, emphysema, or COPD (self-reported) | 199 | 86% | Good |
| <b>Talamo et al. (2007)<sup>17</sup></b>    | Brazil, Chile, Mexico, Uruguay, Venezuela | Cross-sectional<br>( <i>PLATINO</i> ) | General Population, Random sample                         | Post-bronchodilator<br>FEV <sub>1</sub> /FVC<0.7 | Spirometric obstruction and no previous diagnosis of chronic bronchitis, emphysema, or COPD (self-reported) | 758 | 89% | Good |
| <b>Zhang et al. (2013)<sup>30</sup></b>     | China                                     | Cross-sectional                       | Hospitalized patients, all eligible patients were invited | Post-bronchodilator<br>FEV <sub>1</sub> /FVC<0.7 | Spirometric obstruction and COPD not recorded as a discharge diagnosis in medical records                   | 705 | 93% | Fair |

Not Reported (NR)

\* Epidemiologic Study of COPD in Spain (EPI-SCAN)

† Burden of Obstructive Lung Disease (BOLD)

‡ Latin American Project for the Investigation of Obstructive Lung Disease (PLATINO)

§ Prevalence study of COPD in Colombia (PREPOCOL)

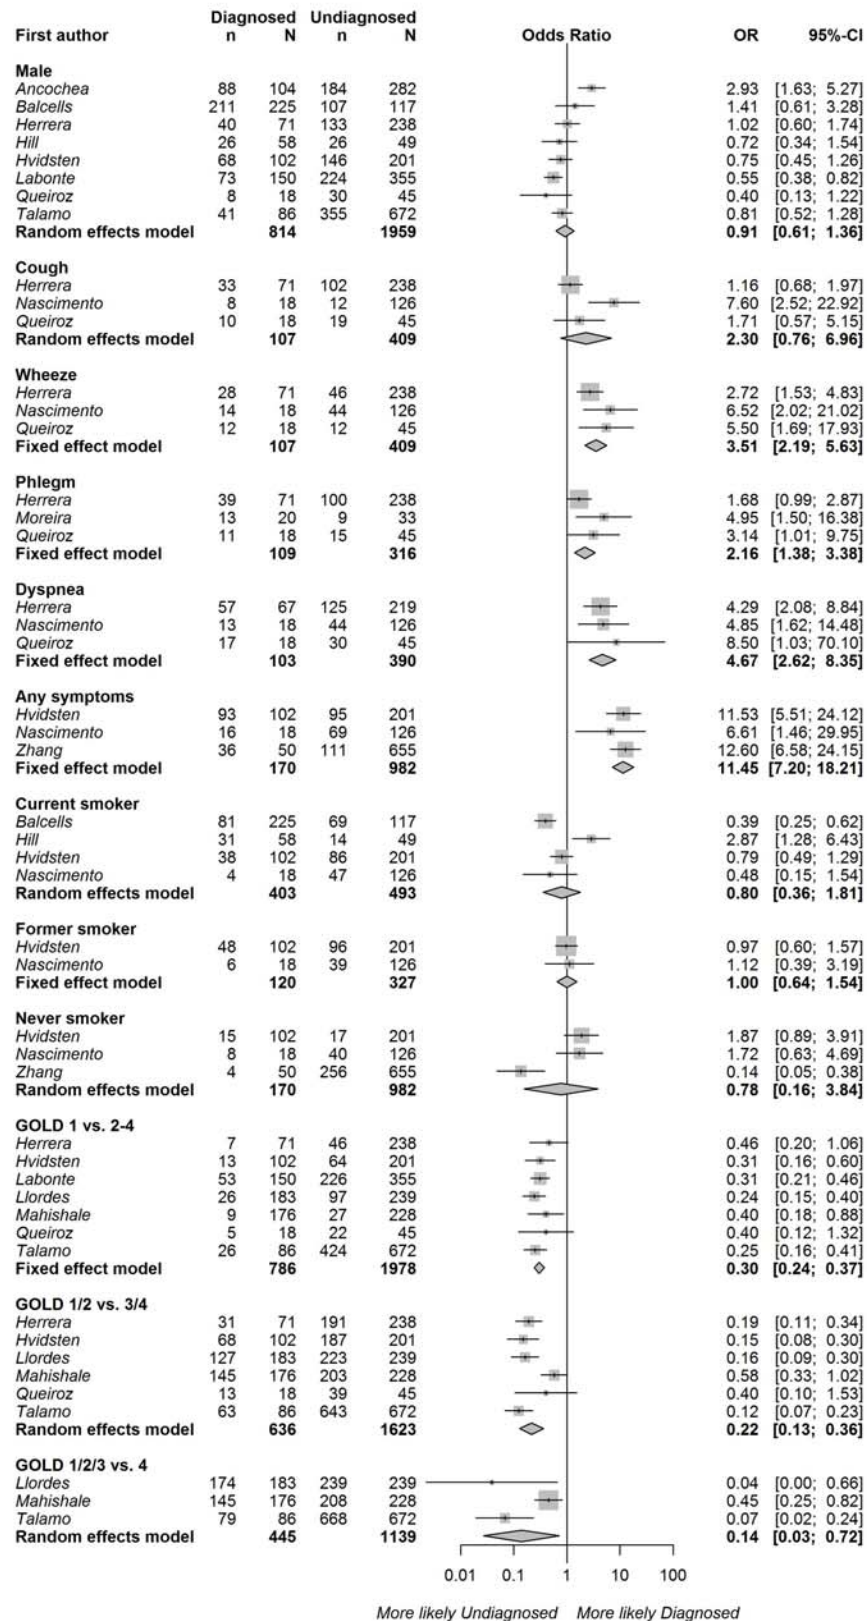

**Figure 2:** Associations between diagnosed (v. ‘undiagnosed’) COPD and sex, the presence of cough, wheeze, phlegm, dyspnoea, any respiratory symptoms, smoking status, smoking history, and COPD severity based on contingency tables. Persistent airflow limitation was defined as post-bronchodilator  $FEV_1/FVC < 0.7$ . Squares represent individual study estimates with the size of the square corresponding to their weight in the pooled estimate (represented with diamonds).



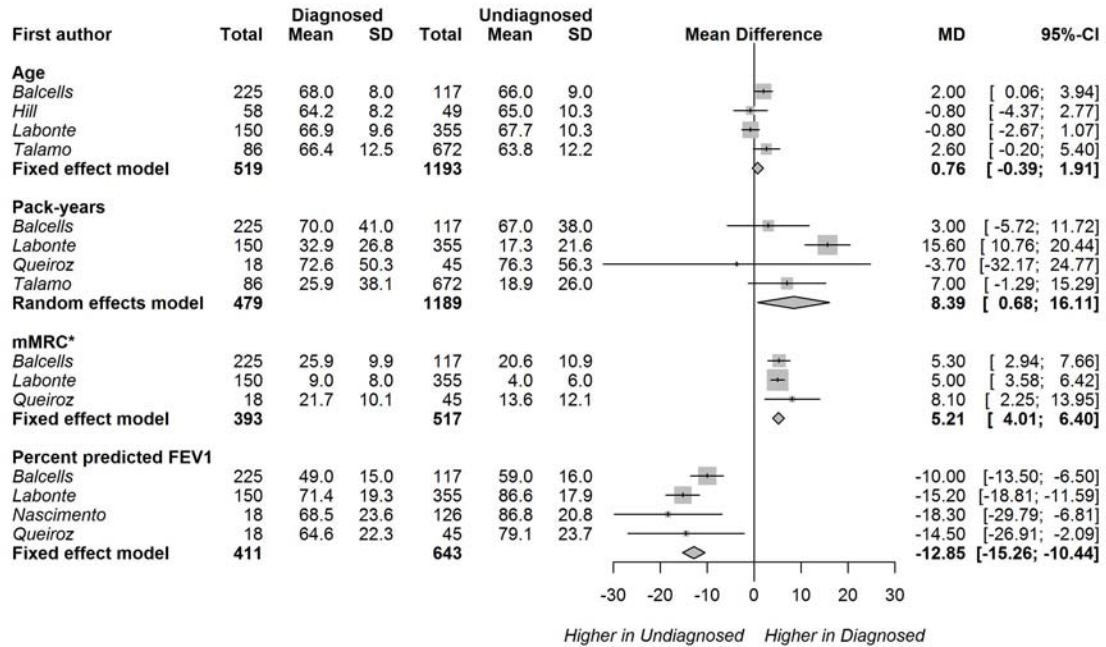

\* modified Medical Research Council (mMRC) Dyspnoea scale<sup>24</sup> means and standard errors (SE) for the diagnosed and undiagnosed categories are multiplied by a factor of 10.

**Figure 3:** Mean difference (MD) in age, pack-years of smoking, mMRC dyspnoea score, and percent of predicted FEV<sub>1</sub> between diagnosed and undiagnosed categories. Persistent airflow limitation was defined as post-bronchodilator FEV<sub>1</sub>/FVC<0.7. Squares represent individual study estimates with the size of the square corresponding to their weight in the pooled estimate (represented with diamonds).

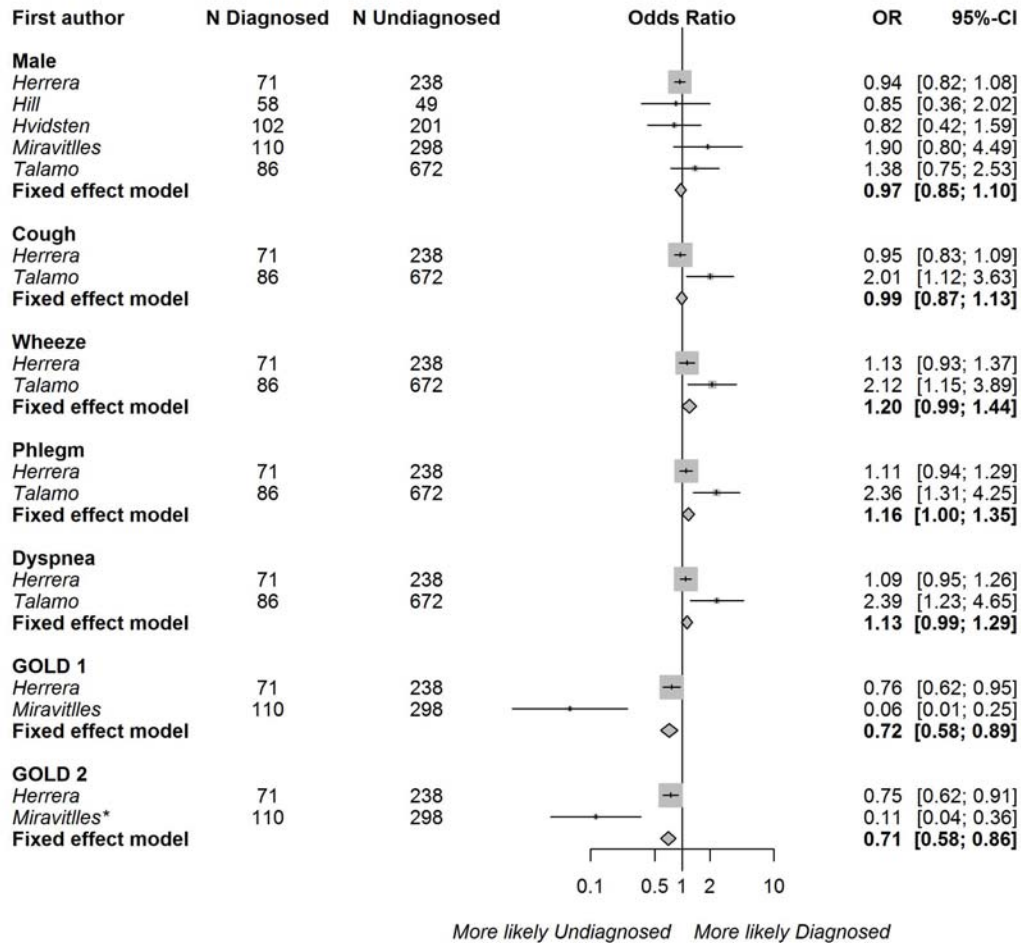

\*The reference category was changed from GOLD grade 1 to GOLD grades 3 and 4 by assuming a covariance of 0 between the dummy variables representing GOLD grades 1 and 2.

Regression models were adjusted for age (*Herrera, Hill, Hvidsten, Miravittles, Talamo*), sex (*Herrera, Hill, Hvidsten, Miravittles, Talamo*), ethnicity (*Herrera, Talamo*), body mass index (*Herrera, Hvidsten*), education (*Herrera, Hvidsten, Miravittles, Talamo*), income (*Hvidsten*), employment (*Talamo*), risk factor to dust (*Herrera*), smoking (*Herrera, Hill, Hvidsten, Miravittles, Talamo*), respiratory symptoms, (*Herrera, Hill, Hvidsten, Talamo*), self-rated health (*Hvidsten, Miravittles*), COPD severity (*Herrera,*

*Miravittles, Talamo*), comorbidities (*Herrera, Hvidsten*), prior health-care use (*Herrera, Hill*), and exacerbations (*Herrera*).

**Figure 4:** Associations between risk factors and the odds of receiving a COPD diagnosis using the regression coefficients from studies with multivariable regression modelling† and persistent airflow limitation defined as post-bronchodilator  $FEV_1/FVC < 0.7$ . The reference categories were female, the absence of cough, wheeze, dyspnoea, phlegm, and GOLD grades 3 and 4, respectively. Squares represent individual study estimates with the size of the square corresponding to their weight in the pooled estimate (represented with diamonds).

†*Herrera et al.*<sup>23</sup> reported prevalence ratios from Poisson regression models.

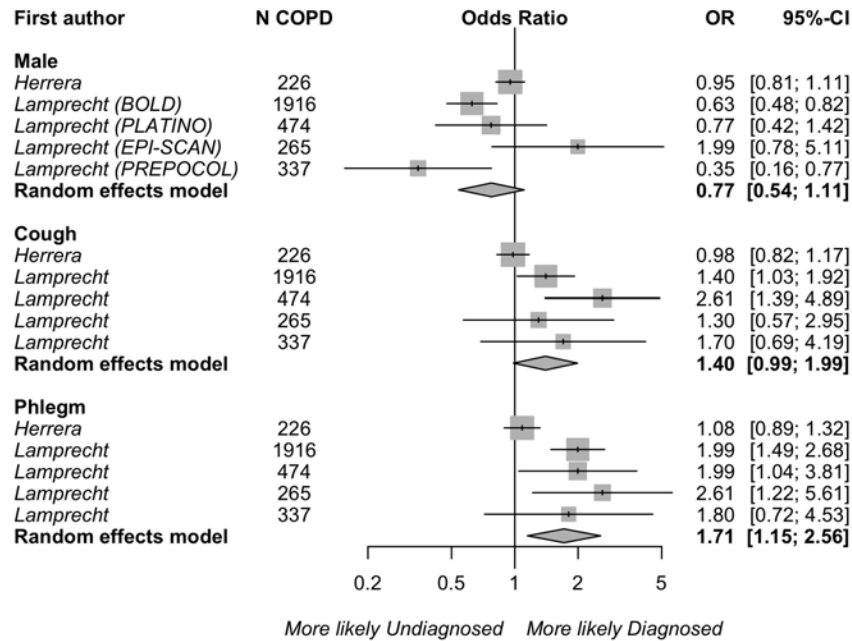

Regression models were adjusted for age (*Herrera, Lamprecht*), sex (*Herrera, Lamprecht*), ethnicity (*Herrera*), body mass index (*Herrera*), education (*Herrera, Lamprecht*), risk factors to dust (*Herrera*), smoking (*Herrera, Lamprecht*), respiratory symptoms (*Herrera, Lamprecht*), COPD severity (*Herrera, Lamprecht*), comorbidities (*Herrera*), and prior health-care use (*Herrera, Lamprecht*).

**Figure 5:** Associations between risk factors and the odds of receiving a COPD diagnosis using the regression coefficients from studies with multivariable regression modelling and persistent airflow limitation defined as post-bronchodilator  $FEV_1/FVC < LLN$ . The reference categories were female, and the absence of cough and phlegm, respectively. The results for each dataset (BOLD, PLATINO, EPI-SCAN, PREPOCOL) analysed in Lamprecht et al.<sup>4</sup> were pooled separately. Squares represent individual study estimates with the size of the square corresponding to their weight in the pooled estimate (represented with diamonds).

## References

- 1 From the Global Strategy for the Diagnosis, Management and Prevention of COPD. Global Initiative for Chronic Obstructive Lung Disease (GOLD) 2017. <http://goldcopd.org> (accessed May 1, 2017).
- 2 Vestbo J, Edwards LD, Scanlon PD, *et al.* Changes in forced expiratory volume in 1 second over time in COPD. *N Engl J Med* 2011; **365**: 1184–92.
- 3 Balcells E, Gimeno-Santos E, de Batlle J, *et al.* Characterisation and prognosis of undiagnosed chronic obstructive pulmonary disease patients at their first hospitalisation. *BMC Pulm Med* 2015; **15**. DOI:10.1186/1471-2466-15-4.
- 4 Lamprecht B, Soriano JB, Studnicka M, *et al.* Determinants of underdiagnosis of COPD in national and international surveys. *Chest* 2015; **148**: 971–85.
- 5 Haroon SM, Jordan RE, O’Beirne-Elliman J, Adab P. Effectiveness of case finding strategies for COPD in primary care: a systematic review and meta-analysis. *NPJ Prim Care Respir Med* 2015; **25**: 15056.
- 6 Decramer M, Miravitlles M, Price D, *et al.* New horizons in early stage COPD--improving knowledge, detection and treatment. *Respir Med* 2011; **105**: 1576–87.
- 7 Kaplan A, Freeman D, Cleland J, Cerasoli F, Price D. Detecting mild COPD is not a waste of resources. *Prim Care Respir J* 2011; **20**: 238–9.
- 8 National Heart, Lung, and Blood Institute. Quality Assessment Tool for Observational Cohort and Cross-Sectional Studies. 2014. <https://www.nhlbi.nih.gov/health->

- pro/guidelines/in-develop/cardiovascular-risk-reduction/tools/cohort (accessed Jan 8, 2017).
- 9 Hansen JE, Sun X-G, Wasserman K. Spirometric criteria for airway obstruction: Use percentage of FEV1/FVC ratio below the fifth percentile, not < 70%. *Chest* 2007; **131**: 349–55.
- 10 PROSPERO: International prospective register of systematic reviews. 2017. <http://www.crd.york.ac.uk/PROSPERO/>.
- 11 Guido Schwarzer. meta: an R package for meta-analysis. *R News* 2007; **7**: 40–5.
- 12 R Core Team. R: a language and environment for statistical computing. Vienna, Austria: R Foundation for Statistical Computing, 2017 <http://www.R-project.org/>.
- 13 Cochran, WG. The combination of estimates from different experiments. *Biometrics* 1954; **10**: 101–29.
- 14 Higgins JPT, Thompson SG, Deeks JJ, Altman DG. Measuring inconsistency in meta-analyses. *BMJ* 2003; **327**: 557–60.
- 15 Moreira GL, Manzano BM, Gazzotti MR, *et al.* PLATINO, a nine-year follow-up study of COPD in the city of Sao Paulo, Brazil: the problem of underdiagnosis. *J Bras Pneumol* 2014; **40**: 30–7.
- 16 Nascimento OA, Camelier A, Rosa FW, *et al.* Chronic obstructive pulmonary disease is underdiagnosed and undertreated in Sao Paulo (Brazil): results of the PLATINO study. *Braz J Med Biol Res* 2007; **40**: 887–95.

- 17 Talamo C, de Oca MM, Halbert R, *et al.* Diagnostic labeling of COPD in five Latin American cities. *Chest* 2007; **131**: 60–7.
- 18 Artyukhov IP, Arshukova IL, Dobretsova EA, Dugina TA, Shulmin AV, Demko IV. Epidemiology of chronic obstructive pulmonary disease: a population-based study in Krasnoyarsk region, Russia. *J COPD* 2015; **10**: 1781–6.
- 19 De Godoy I, Tanni S.E, Coelho L.S, *et al.* Smoking cessation program as a tool for the early diagnosis of chronic obstructive pulmonary disease. *J Bras Pneumol* 2007; **33**: 282–6.
- 20 Ancochea J, Miravittles M, Garcia-Rio F, *et al.* Underdiagnosis of chronic obstructive pulmonary disease in women: quantification of the problem, determinants and proposed actions. *Arch Bronconeumol* 2013; **49**: 223–9.
- 21 Miravittles M, Soriano JB, Garcia-Rio F, *et al.* Prevalence of COPD in Spain: impact of undiagnosed COPD on quality of life and daily life activities. *Thorax* 2009; **64**: 863–8.
- 22 Schirnhofner L, Lamprecht B, Firlei N, *et al.* Using targeted spirometry to reduce non-diagnosed chronic obstructive pulmonary disease. *Respiration* 2011; **81**: 476–82.
- 23 Herrera A.C, De Oca M.M, Varela M.V.L, Aguirre C, Schiavi E, Jardim J.R. COPD underdiagnosis and misdiagnosis in a high-risk primary care population in four Latin American countries. A key to enhance disease diagnosis: The PUMA Study. *PLoS ONE* 2016; **11**: DOI: 10.1371/journal.pone.0152266.

- 24 Fletcher CM, Elmes PC, Fairbairn AS, Wood CH. The significance of respiratory symptoms and the diagnosis of chronic bronchitis in a working population. *Br Med J* 1959; **2**: 257–66.
- 25 Queiroz MC de CAM de, Moreira MAC, Rabahi MF. Underdiagnosis of COPD at primary health care clinics in the city of Aparecida de Goiania, Brazil. *J Bras Pneumol* 2012; **38**: 692–9.
- 26 Hill K, Goldstein RS, Guyatt GH, *et al.* Prevalence and underdiagnosis of chronic obstructive pulmonary disease among patients at risk in primary care. *CMAJ* 2010; **182**: 673–8.
- 27 Labonté LE, Tan WC, Li PZ, *et al.* Undiagnosed Chronic Obstructive Pulmonary Disease Contributes to the Burden of Health Care Use. Data from the CanCOLD Study. *Am J Respir Crit Care Med* 2016; **194**: 285–98.
- 28 Llordes M, Jaen A, Almagro P, *et al.* Prevalence, Risk Factors and Diagnostic Accuracy of COPD Among Smokers in Primary Care. *J COPD* 2015; **12**: 404–12.
- 29 Mahishale V, Mahishale A, Angadi N, *et al.* Screening for chronic obstructive pulmonary disease in elderly subjects with dyspnoea and/or reduced exercise tolerance - A hospital based cross sectional study. *J Chest Dis Tuberc* 2015; **64**: 567–71.
- 30 Zhang J, Zhou J, Lin X, Wang Q, Bai C, Hong Q. Prevalence of undiagnosed and undertreated chronic obstructive pulmonary disease in lung cancer population. *Respirology* 2013; **18**: 297–302.



## Appendix

### Text A1: Search strategy

**Figure A1:** Associations between diagnosed (v. ‘undiagnosed’) COPD and sex, the presence of any respiratory symptoms, smoking status, smoking history, and COPD severity based on the contingency tables of studies using random sampling of the general population. Persistent airflow limitation was defined as post-bronchodilator  $FEV_1/FVC < 0.7$ . Squares represent individual study estimates with the size of the square corresponding to their weight in the pooled estimate (represented with diamonds).

**Figure A2:** Associations between diagnosed (v. ‘undiagnosed’) COPD and sex, the presence of cough, wheeze, phlegm, dyspnoea, and COPD severity based on contingency tables. Persistent airflow limitation was defined as post-bronchodilator  $FEV_1/FVC < \text{lower limit of normal (LLN)}$ . Squares represent individual study estimates with the size of the square corresponding to their weight in the pooled estimate (represented with diamonds).

## Text A1: Search strategy

### MEDLINE (OVID)

March 22, 2017

Database: Ovid MEDLINE(R) In-Process & Other Non-Indexed Citations and Ovid MEDLINE(R) <1946 to Present>

Search Strategy:

- 
- 1 \*pulmonary disease, chronic obstructive/ or \*bronchitis, chronic/ or \*pulmonary emphysema/ (38797)
  - 2 \*airway obstruction/ (11509)
  - 3 \*bronchitis/ or \*bronchiolitis/ or \*bronchiolitis obliterans/ or \*cryptogenic organizing pneumonia/ (18102)
  - 4 \*emphysema/ or \*mediastinal emphysema/ or \*subcutaneous emphysema/ or \*alpha 1-antitrypsin deficiency/ (11041)
  - 5 \*Lung Diseases, Obstructive/ (13636)
  - 6 limit 5 to yr="1980 -2001" (11016)
  - 7 or/1-4,6 (84739)
  - 8 di.fs. [Diagnosis] (2370855)
  - 9 ep.fs. [Epidemiology] (1471514)
  - 10 8 or 9 (3570350)
  - 11 7 and 10 (23089)
  - 12 Diagnostic Errors/ (35551)
  - 13 Delayed Diagnosis/ (4539)
  - 14 Early Diagnosis/ (22251)
  - 15 Airway Obstruction/di [Diagnosis] (2772)
  - 16 underdiagnos\$.mp. (7477)
  - 17 under diagnos\$.mp. (2788)
  - 18 undiagnos\$.mp. (16208)
  - 19 "Diagnostic Techniques and Procedures"/ (2914)
  - 20 Diagnosis, Differential/ (432511)
  - 21 "not diagnos\$".mp. (5636)
  - 22 misdiagnos\$.mp. (26521)
  - 23 or/12-22 (533328)
  - 24 11 and 23 (4893)
  - 25 "Risk Factors"/ (717586)
  - 26 logistic models/ (119410)
  - 27 risk assessment/ (224203)
  - 28 risk factors/ (717586)
  - 29 risk/ (115068)
  - 30 protective factors/ (1844)
  - 31 probability/ (54508)
  - 32 odds ratio/ (79810)
  - 33 risk factor\$.mp. (954945)
  - 34 risk assessment\$.mp. (251708)
  - 35 (characteri#tic? or characteri#e? or characteri#ation).mp. (2499735)
  - 36 or/25-35 (3674000)
  - 37 24 and 36 (992)
  - 38 limit 37 to yr=1980 -current (981)

### EMBASE (OVID)

April 11, 2017

Database: Embase <1974 to 2017 August 14>

Search Strategy:

-----  
1 \*chronic obstructive lung disease/ or \*chronic bronchitis/ or \*lung emphysema/ (68276)  
2 \*airway obstruction/ or \*airflow limitation/ (10588)  
3 \*bronchitis/ or \*chronic bronchitis/ or \*bronchiolitis/ or \*bronchiolitis obliterans/ or \*bronchiolitis  
obliterans organizing pneumonia/ (24818)  
4 \*emphysema/ or \*subcutaneous emphysema/ or \*cigarette smoke-induced emphysema/ or \*elastase-  
induced emphysema/ or \*experimental emphysema/ or \*alpha 1 antitrypsin deficiency/ (9667)  
5 or/1-4 (103405)  
6 di.fs. [Diagnosis] (2921008)  
7 ep.fs. [Epidemiology] (976523)  
8 6 or 7 (3661177)  
9 5 and 8 (21021)  
10 Diagnostic Error/ (50975)  
11 Early Diagnosis/ (89985)  
12 \*Airway Obstruction/di [Diagnosis] (1452)  
13 Diagnostic Procedure/ (80939)  
14 Differential diagnosis/ (334345)  
15 or/10-14 (535842)  
16 9 and 15 (3600)  
17 Risk Factor/ (828169)  
18 regression analysis/ (116928)  
19 multivariate analysis/ (141771)  
20 risk assessment/ (424757)  
21 risk factor/ (828169)  
22 risk/ (496728)  
23 probability/ (75672)  
24 odds ratio/ (12341)  
25 risk factor\$.mp. (1080390)  
26 risk assessment\$.mp. (444895)  
27 (characteri#tic? or characteri#e? or characteri#ation).mp. (3007687)  
28 or/17-27 (4767936)  
29 16 and 28 (717)  
30 underdiagnos\$.mp. (10792)  
31 under diagnos\$.mp. (5242)  
32 undiagnos\$.mp. (23402)  
33 "not diagnos\$.mp. (8488)  
34 misdiagnos\$.mp. (37341)  
35 unrecogni\$.mp. (33790)  
36 Delayed Diagnosis/ (9134)  
37 or/30-36 (123603)  
38 9 and 37 (663)  
39 29 or 38 (1299)  
40 limit 39 to yr="1980 -current" (1296)  
41 limit 40 to "english language" (1049)  
42 40 not 41 (247)

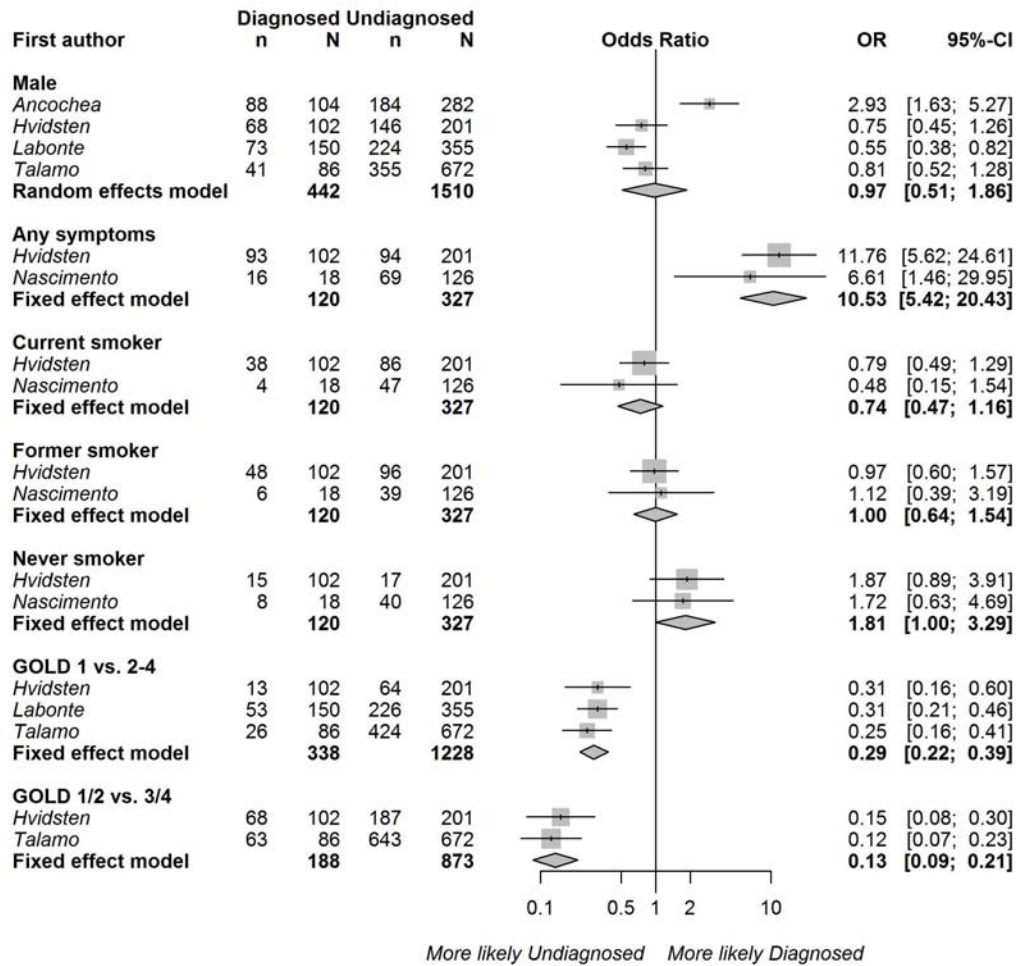

**Figure A1:** Associations between diagnosed (v. ‘undiagnosed’) COPD and sex, the presence of any respiratory symptoms, smoking status, smoking history, and COPD severity based on the contingency tables of studies using random sampling of the general population. Persistent airflow limitation was defined as post-bronchodilator FEV<sub>1</sub>/FVC<0.7. Squares represent individual study estimates with the size of the square corresponding to their weight in the pooled estimate (represented with diamonds).

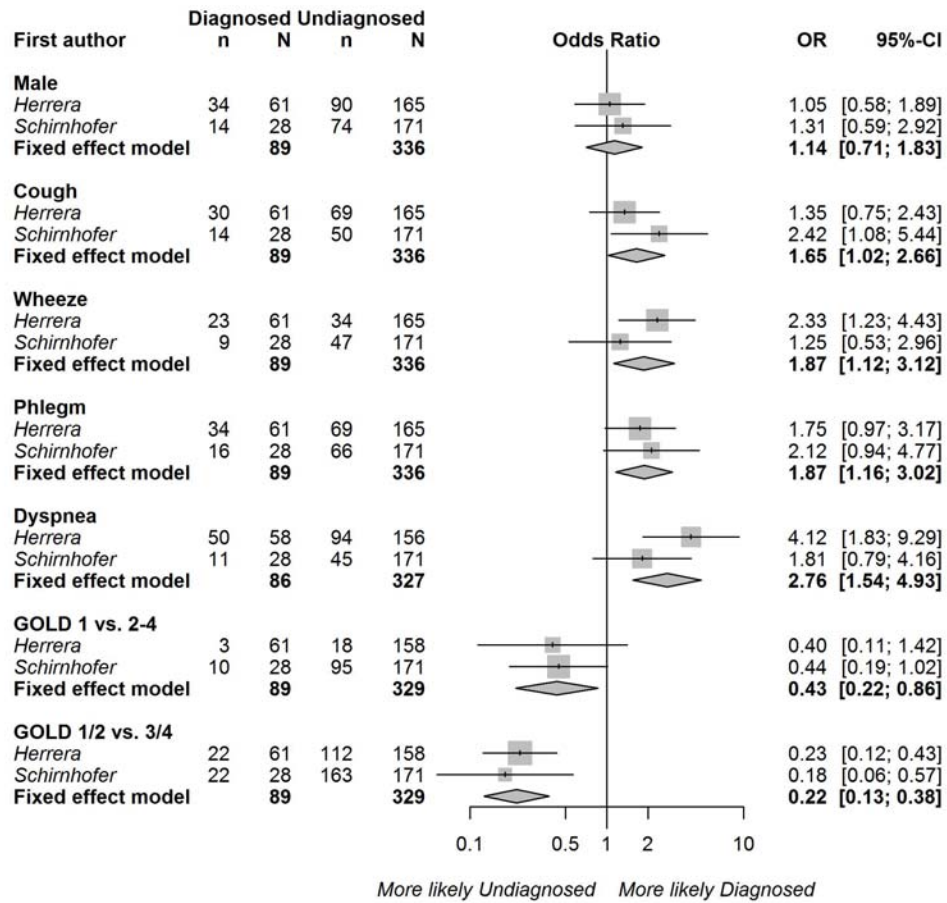

**Figure A2:** Associations between diagnosed (v. ‘undiagnosed’) COPD and sex, the presence of cough, wheeze, phlegm, dyspnoea, and COPD severity based on contingency tables. Persistent airflow limitation was defined as post-bronchodilator FEV<sub>1</sub>/FVC < lower limit of normal (LLN). Squares represent individual study estimates with the size of the square corresponding to their weight in the pooled estimate (represented with diamonds).
